# Supplementary material for: Morphological signs of connective tissue dysplasia as predictors of frequent post-exercise musculoskeletal disorders
Source: PubMed Central journal article supplement (PMC7545870; doi:10.1186/s12891-020-03698-0), 2020-10-08
Supplement: 12891_2020_3698_MOESM2_ESM.pdf [file 12891_2020_3698_MOESM2_ESM.pdf]

# QUESTIONNAIRE №

## I. PATIENT FORM

Full name

Mobile phone

Sex

F

M

Age

1. Please answer the following questions truthfully. Be as thorough as possible:

- 1) Do you have any active complaints about your wellbeing?
- 2) How would you describe the presence of pain in your life.
- 3) How would you best describe your health?
- 4) Please thoroughly describe your physical exercise regimen.

2. Please answer the following questions by using a scale from 1-10, where 1 is “Strongly disagree” and 10 is “Strongly agree”:

- 1) I experience pain in my spine.
- 2) My joint “crunch”.
- 3) I have had ligament sprains and/or ruptures.
- 4) I have experienced bone injury.
- 5) I have experienced bone fractures.
- 6) I feel a “crunching” and/or “grinding” sensation when I chew.
- 7) I feel pain in my joints.
- 8) I have had dislocated joints.
- 9) I experienced joint subluxations.
- 10) I am often tired.
- 11) I do not get enough sleep.
- 12) I wake up tired.

Please rate (1-10):

- |                           |   |   |   |   |   |   |   |   |   |    |
|---------------------------|---|---|---|---|---|---|---|---|---|----|
| 1) <u>QUALITY OF LIFE</u> | 1 | 2 | 3 | 4 | 5 | 6 | 7 | 8 | 9 | 10 |
| 2) <u>OVERALL HEALTH</u>  | 1 | 2 | 3 | 4 | 5 | 6 | 7 | 8 | 9 | 10 |

## II. EXAMINATOR FORM

### 1. Primary assement:

|                               |  |                                         |  |
|-------------------------------|--|-----------------------------------------|--|
| Spine pain                    |  | "Crunch" in the temporomandibular joint |  |
| "Crunch" in the joints        |  | Arthralgia                              |  |
| Ligament sprains and ruptures |  | Joint dislocations and subluxations     |  |
| Bone fractures                |  | Asthenic syndrome                       |  |
| Blood pressure                |  | Heart rate                              |  |

### 2. Anamnesis:

### 3. The type of exercise that caused the injury:

### 4. Anthropometric measurements:

|                |  |                      |  |                     |  |
|----------------|--|----------------------|--|---------------------|--|
| Weight         |  | Height               |  | Chest volume        |  |
| Quetelet Index |  | Varga Index          |  | Verveque Index      |  |
| Pigne Index    |  | Arm swing            |  | Arm swing/height    |  |
| Foot height    |  | Foot length          |  | Foot length/height  |  |
| Face height    |  | Zygomatic width      |  | Facial index        |  |
| Wrist length   |  | Middle finger length |  | Wrist length/height |  |

### 5. Osteo-articular signs:

|                              |  |                                         |  |
|------------------------------|--|-----------------------------------------|--|
| Scoliosis                    |  | Flatfoot                                |  |
| Kyphosis                     |  | Feet valgus installation                |  |
| Kyphoscoliosis               |  | X- and O-shaped legs                    |  |
| «Flat» back                  |  | Macrodaetyly of the first toe           |  |
| Shoulder blades' asymmetry   |  | Joint hypermobility (Bayton's criteria) |  |
| Shoulder asymmetry           |  | Wide-set eyes                           |  |
| Pelvic bones' asymmetry      |  | Gothic high palate                      |  |
| Pterygoid shoulder blades    |  | Malocclusion                            |  |
| Infundibular chest deformity |  | Keel-shaped chest deformity             |  |
| Micrognathia                 |  | Nasal septum curvature                  |  |
| Hammer toes                  |  | Hip displasia                           |  |
| Wrist test                   |  | Thumb test                              |  |

### 6. Mvopathic and ectodermal signs:

|                                 |  |                                               |  |
|---------------------------------|--|-----------------------------------------------|--|
| <b>Myotonic syndrome</b>        |  | <b>Skin hyperpigmentation above the spine</b> |  |
| <b>Rectus muscles diastasis</b> |  | <b>Atrophic striae</b>                        |  |
| <b>Recurrent hernia</b>         |  | <b>Teleangiectasia</b>                        |  |
| <b>Thin hyperelastic skin</b>   |  | <b>Nails (soft/fragile/exfoliated)</b>        |  |
| <b>Nosebleeds</b>               |  | <b>Hair (thin/brittle/areas of alopecia)</b>  |  |
| <b>Keloid scars</b>             |  | <b>Auricles (soft/rolled into a tube)</b>     |  |
| <b>Petechia</b>                 |  | <b>Ecchymosis</b>                             |  |
| <b>Bluish / blue sclera</b>     |  | <b>The "tissue paper" symptom</b>             |  |

**7. Internal signs:**

|                                          |  |                                |  |
|------------------------------------------|--|--------------------------------|--|
| <b>Mitral valve prolapse</b>             |  | <b>Astigmatism</b>             |  |
| <b>Vascular dystonia</b>                 |  | <b>Cataract</b>                |  |
| <b>Pulse, beats/min</b>                  |  | <b>Glaucoma</b>                |  |
| <b>Systolic blood pressure</b>           |  | <b>Lens subluxation</b>        |  |
| <b>Diastolic blood pressure</b>          |  | <b>Strabismus</b>              |  |
| <b>Lower extremities' varicose veins</b> |  | <b>Myopia</b>                  |  |
| <b>Hemorrhoids</b>                       |  | <b>Biliary dyskinesia</b>      |  |
| <b>Esophagus Diverticula</b>             |  | <b>Chronic esophagitis</b>     |  |
| <b>Hiatal hernia</b>                     |  | <b>Gastroesophageal reflux</b> |  |
| <b>Kidney, liver cysts</b>               |  | <b>Organ ptosis</b>            |  |
| <b>Urinary incontinence</b>              |  | <b>Lungs Emphysema</b>         |  |

**III. STUDY NOTES.**  
**(include date of note)**
